# Supplementary material for: Biogeochemical processes accounting for the natural mercury variations in the Southern Ocean diatom ooze sediments
Source: Copernicus journal article supplement (doi:10.5194/os-2019-132), 2020-01-15
Supplement: Supplementary file [file os-2019-132-RC2-supplement.pdf]

# Biogeochemical processes accounting for the natural mercury variations in the Southern Ocean diatom ooze sediments

Sara Zaferani<sup>1</sup>, Harald Biester<sup>1</sup>

<sup>1</sup>Institut für Geoökologie AG Umweltgeochemie, Technische Universität Braunschweig, Braunschweig, 38106, Germany

Correspondence to: Sara Zaferani (s.zaferani@tu-braunschweig.de)

**Abstract.** Understanding the marine biogeochemical cycle of mercury is crucial as consumption of mercury enriched marine fish is the most important pathway of mercury uptake by humans. However, due to the lack of long term marine records, the role of the oceans in the global mercury cycle is poorly understood. And we do not have well documented data of natural mercury accumulations during changing environmental conditions, e.g. sea surface conditions in the ocean. To understand influence of different sea surface conditions (climate induced changes in ice coverage and biological production) on natural mercury accumulation, we used a continuous ~ 170 m Holocene biogenic sedimentary record from Adélie Basin, East Antarctica, which mainly consists of silica based skeletons of diatoms. We performed Principal Component Analysis and regression analysis on element concentrations and corresponding residuals of element concentrations, respectively to investigate the link between sediment mercury accumulation, terrestrial inputs, and productivity. Preindustrial mercury accumulation in the remote basin pristine marine Antarctica showed extremely high accumulation rates (median: 556  $\mu\text{g m}^{-2} \text{yr}^{-1}$ ) that displayed periodic-like variations. Our analysis shows that the variations in total mercury concentrations and accumulation rates are associated with biological production and related scavenging of available water phase mercury by rapidly sinking algae or algae derived organic matter after intense algae blooms. High accumulation rates of other studied elements further revealed that in regions of high primary productivity, settling of biogenic materials removes many other elements from ocean surface (through scavenging or biological uptake). In conclusion, the link between mercury cycling and primary production will need to be considered in future studies of the marine mercury cycle under future primary production enhancement through climatic, temperature, and nutrient availability changes.

Commented [PM1]: Rewrite sentence

Commented [PM2]: Rewrite sentence

Commented [PM3]: Rewrite sentence

## 1 Introduction

Mercury (Hg) is a metal of environmental concern due to its ability to be transported from sources to background regions (predominantly in-through the atmosphere) and be transformed into highly bioaccumulative and toxic methylated forms. In the biogeochemical cycle of Hg, the ocean, as the dominant physical feature of our planet Earth, is of specific concern. A substantial amount of Hg (~ 80 %) which is emitted to the atmosphere from natural and anthropogenic sources reaches the ocean (Horowitz et al., 2017; Schartup et al., 2019) and ocean sediments, have been considered as to be

Commented [PM4]: Reword

Commented [PM5]: Reword

29 an ultimate sink of Hg on a timescale of tens of thousands of years (Fitzgerald et al., 2007; Selin, 2009; Amos et al., 2013).  
30 Despite the critical role this sink process plays in the Hg biogeochemical cycle, little is known about the rates or amount of Hg  
31 accumulation in marine sediments, especially in the open ocean. In contrast to the well-studied Hg cycling in terrestrial  
32 environments, knowledge about the temporal and spatial distribution of Hg in the marine environment is limited to model  
33 estimations (Mason and Sheu, 2002; Sunderland and Mason, 2007) and water column measurements (Cossa et al., 2011;  
34 Lamborg et al., 2014). A main reason for our limited understanding of the fate of Hg in the oceans is the lack of high resolution  
35 marine sedimentary records, especially from the deep ocean (Zaferani et al., 2018).

36 The Hg input to the ocean is primarily through atmospheric deposition (Mason et al., 1994; Driscoll et al., 2013). After  
37 deposition, as either mercuric ion ( $\text{Hg}^{2+}$ ) or elemental Hg ( $\text{Hg}^0$ ), Hg can be (i) reduced to  $\text{Hg}^0$  and evaded to the atmosphere,  
38 or (ii) scavenged from the water column by particulate matter and eventually buried in deep sea sediments, or (iii) methylated  
39 to either monomethylmercury ( $\text{CH}_3\text{Hg}^+$ ) or dimethylmercury ( $(\text{CH}_3)_2\text{Hg}$ ) (Mason et al., 2012; Lamborg et al., 2014). While  
40 models may differ in their predicted Hg values in the surface, subsurface and deep ocean, they all agree that the flux of Hg to  
41 the deep ocean is low (Lamborg et al., 2002; Mason and Sheu, 2002; Sunderland and Mason, 2007; Amos et al., 2013). Mason  
42 and Sheu (2002) estimated that almost 96 % of the atmospheric Hg flux to the ocean is lost through re-emission from the ocean  
43 surface, and only 30 % of the Hg flux that reaches the deep ocean is preserved in sediments. However, available data sets on  
44 Hg fluxes to the deep oceans and accumulation rates in deep ocean sediments are limited and applying the model estimates  
45 across the entire ocean introduces substantial uncertainty.

46 One area in particular that highlights this uncertainty is the underestimation of the role of biological productivity in the global  
47 Hg cycle. The marine biogeochemical cycle of many elements (Morel and Price, 2003), including Hg (Lamborg et al., 2016;  
48 Zaferani et al., 2018), in seawater is controlled directly and indirectly by biological productivity. Regions of high biological  
49 productivity play an important role in the downward transport and burial of biologically essential and nonessential elements in  
50 the sediments of the deep sea (Schlesinger and Bernhardt, 2013). This assumption for Hg is supported by water column  
51 measurements. Lamborg et al. (2014) showed a nutrient-nutrient-like distribution of Hg in the ocean water column of oceans.  
52 This study indicates that similar to carbon (C) and phosphorus (P), Hg shows higher concentrations in the deep water due to  
53 its release during organic matter decomposition. This can be due to the Hg—phytoplankton interactions and taking up uptake  
54 of Hg from the water phase by phytoplankton (Le Faucheur et al., 2014; Mason et al., 1996). This interaction controls the flux  
55 of Hg from the water column to sediments in several ways. First, scavenging of Hg from surface water by particulate organic  
56 matter reduces the availability of  $\text{Hg}^{2+}$  for reduction to  $\text{Hg}^0$ . So, the re-emission flux of  $\text{Hg}^0$  from productive regions will be  
57 lower (Soerensen et al., 2016; Zaferani et al., 2018). Second, Hg scavenging by algae removes Hg from the dissolved phase  
58 and may shift the flux of Hg between the atmosphere and the ocean towards the dissolved phase by changing the dissolution  
59 equilibrium (Biester et al., 2018; Zaferani et al., 2018). Third, removal of dissolved Hg from the water column by algae and

Commented [PM6]: Reword

60 other particulate matter facilitates the downward flux of Hg to the seafloor (Lamborg et al., 2016), which, as mentioned, has  
61 traditionally been considered to be slow in its nature. Thus, underestimating the role of biological productivity in the marine  
62 biogeochemical cycle of Hg may lead to an overestimation of re-emission fluxes from surface water and ~~underestimates an~~  
63 ~~underestimation of~~ the Hg flux to deep sea sediments.

Commented [PM7]: This can be condensed

64 In this context, the Southern Ocean is of particular interest due to its high concentrations of nutrients and related elevated  
65 primary productivity (Arrigo et al., 1998). In the Southern Ocean, diatoms are major primary producers (Crosta et al., 2005).  
66 Their siliceous cell walls preserve well in sediments and form diatom ooze (Fütterer, 2006). The sedimentation rate of diatom  
67 ooze is high, estimated to reach up to 2 cm yr<sup>-1</sup> (Escutia et al., 2011). ~~This high sedimentation rate makes diatom ooze making~~  
68 deposits around Antarctica a unique geochemical archive to study the influence of primary productivity on the accumulation  
69 of Hg as well as to ~~entangle changes~~ in the natural and anthropogenic marine biogeochemical cycle.

Commented [PM8]: Reword

70 Despite providing a unique geochemical archive, studies on Hg cycling in the Southern Ocean, ~~and~~ particularly in the Antarctic  
71 region, are generally limited to ~~the~~ water column (Cossa et al., 2011) and ice cores measurements (Vandal et al., 1993). [Cossa  
72 et al. (2011) showed that Hg concentrations range between 0.63 and 2.76 pmol L<sup>-1</sup> in open water, 1.15 ± 0.22 pmol L<sup>-1</sup> in  
73 Antarctic Intermediate Water, and 1.35 ± 0.39 pmol L<sup>-1</sup> in Antarctic Bottom Water between the Antarctic continent and  
74 Tasmania.] The observed variations in the vertical distributions of Hg were attributed to air-sea exchange and the affinity of Hg  
75 to bind to planktonic and inorganic particulate matter in the biologically productive zone. Hg concentrations in an ice core,  
76 covering the past 34 Kyr, varied between 0.0005 and 0.0021 µg kg<sup>-1</sup>, corresponding to depositional fluxes of 0.009 and 0.031  
77 µg m<sup>-2</sup> yr<sup>-1</sup> during the Holocene and the Last Glacial Maximum, respectively (Vandal et al., 1993). Vandal et al. (1993)  
78 attributed the observed enhanced Hg flux during colder periods to marine biological productivity and emissions of volatile Hg  
79 compounds from the ocean.

Commented [PM9]: This should be rewritten to explain the Hg distribution more clearly

80 In a previous paper, we discussed the accumulation of anthropogenic Hg in ~~Adélie Basin~~ sediments of the Adélie Basin  
81 offshore East Antarctica. The ~2-fold increase in Hg concentrations and accumulation rates in the upper ~2.80 m depth of the  
82 core was attributed to the onset of the industrial revolution and the strong increase in coal burning at ~1850 CE (Zaferani et  
83 al., 2018). Here we discuss the natural processes (e.g. changes in biogenic and terrestrial material fluxes) that controlled Hg  
84 accumulation in the same sediment core prior to 1850 CE throughout the past 8600 years. We investigated the continuous ~  
85 170 m long Holocene laminated diatom ooze sediment record from the Adélie Basin offshore East Antarctica. Covering almost  
86 the entire Holocene, the core allows the determination of natural variations of in Hg accumulation rates in these sediments  
87 prior to major anthropogenic influences. Our main objective was to investigate the influence of different Hg sources, climate  
88 induced changes in biological productivity and terrestrial fluxes (through melting of glacier ice), which have controlled the  
89 sequestration of Hg in these sediments. To evaluate the influence of different biogeochemical processes on the Hg

90 accumulation in sediments, with an emphasis on the role of changes in planktonic productivity, we combined the data on Hg  
91 accumulation with data derived from multi element analyses.

## 92 2. Materials and methods

### 93 2.1 Study site and core collection

94 Sediments of the Adélie Basin were collected during the Integrated Ocean Drilling Program (IODP) Expedition from the hole  
95 U1357B 318 in 2010. ~~The hole~~ U1357B is located on the continental shelf off of Wilkes Land at the Mertz Glacier polynya  
96 (regions of open water surrounded by sea ice), Antarctica (66°24.7990' S, 140°25.5705' E) at about 1021.5 m water depth  
97 (Escutia et al., 2011) (Fig 1). The total length of the recovered core is 170.7 m, corresponding to nearly the entire Holocene  
98 (Escutia et al., 2011). The core was sliced by 5cm<sup>3</sup>e plastic scoops (1cm wide samples). Samples in the upper core (3.2–25.05  
99 mbsf) were taken at a resolution of ~ 20 years and at resolutions of ~ 200 years in deeper sections (25.05–170.35 mbsf),  
100 resulting in a total of 78 samples.

101 The sediment core is characterized by light and dark laminations which are undisturbed by sea level changes or glacial erosion  
102 (Denis et al., 2006; Escutia et al., 2011). Light laminations correspond to spring seasons when light and high nutrients~~s~~ levels  
103 promote intense phytoplankton blooms and are mainly composed of biogenic materials, ~~i.e.~~ (mostly diatom with minor  
104 abundance of silicoflagellates, sponge spicules, radiolarians, and foraminifers). ~~Whereas~~ Dark layers correspond to the  
105 summer/autumn season when sea ice has retreated, and nutrient levels are low. Dark laminations are composed of a mixture of  
106 biogenic and terrigenous materials resulting from summer production in open water, ~~and with~~ glacial and subglacial inputs,  
107 respectively. High levels of primary production in surface water of this region, coupled with rapid fluxes of biogenic debris,  
108 directly to the seafloor, led to high sedimentation rates of up to 2.0 cm yr<sup>-1</sup> during the past 10,000 years (Escutia et al., 2011).

### 109 2.2 Analyses of mercury and major and trace metals

110 All samples were freeze dried and ground using a glass pestle prior to geochemical analysis. Total Hg was determined by  
111 thermal decomposition followed by pre-concentration of Hg on a gold trap and CVAAS Hg detection using a Milestone  
112 DMA80 analyzer (US EPA Method 1998). The quality of the analysis was ensured by including a certified reference material  
113 (CRM) (Canmet LKSD-4 = 190 ± 17 ng g<sup>-1</sup>) alongside the analyzed samples. The average measured concentration for LKSD-  
114 4 was 197 ± 11 ng g<sup>-1</sup>. Replicate analyses (n = 20) were always within an RSD of 10 % of the certified value.

115 The samples were analyzed for concentrations of silicon (Si), titanium (Ti), zirconium (Zr), sulfur (S), calcium (Ca), potassium  
116 (K), aluminum (Al), yttrium (Y), manganese (Mn), strontium (Sr), iron (Fe), lead (Pb), copper (Cu), zinc (Zn), arsenic (As),  
117 bromine (Br), nickel (Ni), chlorine (Cl), and rubidium (Rb) by ~~means of~~ energy dispersive X-ray fluorescence (ED-XRF). The

118 calibration method, accuracy, and precision are described in detail in Cheburkin and Shotyky (1996). The CRMs (Canmet  
119 LKSD-4, NRC/CNRC-PACS-2, NRC/CNR-Mess-3, and NCS-DC75304) and replicates were measured in each set of samples  
120 for accuracy and precision control. Repeated analysis of CRMs gave relative standard deviation (SRD) less than 10 % for Si,  
121 Al, Ca, Y, Sr, Zr, Br, and Rb, 6–15 % for Ti, K, Zn, S, Fe, Mn, and Pb, 6–19 % for Cl, 10–20 % for Ni, 9–14 % for Cu, and  
122 14–22 % for As.

### 123 2.3 Statistical analyses

124 Principal component analysis (PCA) was applied to the major and trace element concentrations to identify processes controlling  
125 the variability of elements in the sediments. When there is a complex set of variables, PCA is used to reduce a large number  
126 of variables to a new set of artificial variables, called principal components. Each component includes variables with a similar  
127 down core pattern. The principal components are then interpreted in terms of relevant geochemical processes that can control  
128 the variability of the major and trace elements in the sediments. The derived interpretation from PCA was then combined with  
129 the Hg data to examine the processes that could affect Hg accumulations. The analysis was performed on the standardized  
130 concentration data using Z-scores.

131 Regressions analysis of the corresponding residuals was used, ~~too~~ to establish the important elemental relationships, by  
132 considering Si concentration as an independent variable and other element concentrations as dependent variables. Correlation  
133 analysis and PCA were performed using the statistical software SPSS 25.0.

## 134 3. Results and discussion

### 135 3.1 Elemental composition of the diatom ooze sediments and geochemical processes controlling their distribution

136 Concentration profiles and accumulation rates of Si, Al, K, Ti, S, Ca, Zn, Fe, Br, As, and Cl are shown in Fig. 2-5 and discussed  
137 in supplementary materials. The preindustrial geochemical record of Adélie Basin sediments is generally characterized by  
138 periodic-like variations in the relative abundance of major and trace elements. The records of element accumulation rates  
139 largely follow those of periodic-like variations of concentrations and show no significant trend with depth (except Cl).

140 The PCA resulted in five components, explaining almost 82 % of the total variance (Table 1). The first component (Cp1),  
141 explains 33 % of the variance and shows large (> 0.7) positive loadings of Mn, Ti, Rb, Zr, K, and Y and moderate positive  
142 loading of Fe. The second component (Cp2), which explains 20 % of the variance, is characterized by large positive loadings  
143 of Al, Si, S, and Cl and moderate positive loading of K and Ca. The third component (Cp3) explains 17 % of the variance and  
144 shows large positive loadings of Zn, Cu, and Ni and moderate positive loading of Fe. The fourth and fifth components (Cp4  
145 and Cp5) account for 7 and 5 % of the variance, respectively. Cp4 is characterized by high positive loadings for Hg and As  
146 and moderate negative loading of Pb. Cp5 shows positive loadings for Sr and Ca.

Commented [PM10]: This should be defined

Commented [PM11]: These figures should be discussed throughout this section

147 In general, results of PCA imply that opening and closing of the polynya and biological production are the most important  
148 factors influencing sedimentation in the Adélie Basin. This has been shown by loadings of elemental proxies for terrigenous  
149 and biological material inputs. Briefly, Cp1, which includes positive loadings of lithogenic elements, represents the variability  
150 of terrigenous inputs. Melting of ice releases trapped lithogenic material into the water and leads to the sinking of lithogenic  
151 particles and their sedimentation. Cp2 comprises loading of elements of both biogenic and terrigenous sources. This component  
152 appears to reflect phytoplankton blooms and export of biological materials. After ice melt, when the ice is opening, favorable  
153 conditions for biological productivity lead to phytoplankton blooms and export of biogenic materials to the seafloor (Denis et  
154 al., 2006). Biogenic material is mainly biogenic silica because diatoms are a major component of blooms in the Adélie Basin  
155 (Escutia et al., 2011). The sinking of diatoms from the surface and their sedimentation can cause scavenging of elements during  
156 bloom time. Al shows positive loadings in this component rather than in Cp1. This, other than association with the flux of  
157 aluminosilicates material can also be attributed to the scavenging of Al by diatom particles (Moran and Moore, 1992). Cl also  
158 shows loading in Cp2. The possible explanation for the observed covariation is that marine phytoplankton is rich in  
159 polyunsaturated lipids and can account as chlorination substrates (Leri et al., 2015). However, the organic C content of Adélie  
160 Basin sediments is generally low (between 1 and 2 wt %), and some of the Cl must be in an inorganic form trapped in sediments  
161 owing to high sedimentation rates. Cp3 is mainly characterized by elements that are associated with the organic fraction of  
162 diatom cells. This component appears to reflect the remineralization process. Trace elements associated with organic parts of  
163 cells can be released back into the water column during decomposition. Therefore, cellular locations of elements, i.e. opal  
164 frustules of diatoms or organic matter of diatom cells, created different components of Cp2 and Cp3. Cp4 consists of particle  
165 reactive metals, e.g. Hg and Pb. The possible explanation for not having these two particle reactive metals in Cp2 is that these  
166 two metals begin to enter the system after ice melting, while Cp2 shows scavenging of elements by diatoms that are already  
167 present in the water column. Since Pb and Hg are negatively correlated, this component cannot reflect a pollution signal.  
168 Covariation of Ca and Sr in Cp5 represents sedimentation of planktonic foraminifera, which appears to be of minor importance  
169 here.

170 Cp1 explains 33 % of the variance and accounts for much of the variability/process which controlled the geochemical  
171 composition of these sediments. However, the high concentration of Si and low concentrations of terrigenous elements imply  
172 that in an environment like Adélie Basin, with extremely high productivity, input of lithogenic materials is changing while  
173 different diatoms taxa are always present in the system, e.g. as sea ice associated and open ocean diatom.

174 Although the core was not sampled at one year resolution, the fluctuations of elemental concentrations are likely related to the  
175 seasonal variation of sea surface conditions like ice melting and freezing and its subsequent biological or terrestrial materials  
176 exports. Sampling in light (associated with spring seasons) or dark (associated with summer/autumn seasons) laminae, which  
177 contain different amounts of biogenic or terrestrial materials can cause the observed variations (see Sect. 2.1).

Commented [PM12]: Reword

178 The element concentrations are comparable to other published sediment data, while the accumulation rates are much higher  
179 than other reported values. The existence of rapidly settling particles in Adélie Basin can explain the high element accumulation  
180 rates. The ~~high accumulation~~ rates suggest that most elements in the water column of Adélie Basin are subjected to removal  
181 by intense phytoplankton blooms through consumption or scavenging. Aggregation of diatoms, which creates large particles,  
182 ~~and their sinking~~ to the seafloor and can create a space in which elements can be trapped (Shanks and Trent, 1979). This  
183 enhances removal of elements from the water column and their sedimentation as well.

### 184 3.2 Holocene record of mercury concentrations and accumulation rates

185 In the preindustrial period, i.e. from the bottom of the core at ~ 170 m to 2.80 m depth (8600 years ago to ~ 1850 CE), the Hg  
186 record shows no obvious trend with depth but rather periodic-like variations. Hg concentrations fluctuate ~~by a factor of about~~  
187 ~~2~~ between 12.6 and 21.1  $\mu\text{g kg}^{-1}$  within 170-137 m depth and between 21.7 and 44.6  $\mu\text{g kg}^{-1}$  within 137-2.80 m depth of the  
188 core, with two more pronounced peaks at around 9.99 and 8.20 m depth. The lower concentration of Hg within 170-137 m  
189 depth of the core is probably attributed to the cooler ~~condition~~ temperature and sea ice cover during this period. Hg  
190 accumulation rates in the preindustrial period largely follow the Hg concentration record, with a median of  $556 \mu\text{g m}^{-2} \text{yr}^{-1}$ .

Commented [PM13]: Reference relevant figures

Commented [PM14]: Reference?

191 The high preindustrial Hg accumulation rates in Adélie Basin sediments cannot be explained by preindustrial atmospheric Hg  
192 depositions alone, which did not exceed  $20 \mu\text{g m}^{-2}$  as recorded in an Antarctic ice core (Vandal et al., 1993). Therefore, non-  
193 atmospheric sources, such as dissolved water phase Hg or terrestrial inputs, are needed for Hg enrichment in these sediments.

194 To identify driving forces behind the variations in Hg accumulation we used our PCA results. PCA demonstrated that two main  
195 processes, i.e. biogenic productivity and lithogenic inputs, controlled the flux of elements to Adélie Basin sediments. The  
196 component scores, which illustrate the depth dependency of the extracted components, are characterized by see-saw patterns  
197 throughout the entire core. This indicates different contributions of biogenic and terrigenous inputs most likely associated with  
198 spring and summer/autumn seasons, respectively.

199 The variance of Hg was not captured by Cp1, Cp2 or Cp3. Hg instead forms a group on Cp4 together with positive loading of  
200 As and negative loading of Pb. The absence of significant loading of Hg on Cp1, Cp2, and Cp3 (Table 1) and the lack of  
201 similarity between component scores and Hg concentrations (Fig. 7 and 8), in the preindustrial period, indicates that Hg fluxes  
202 are not significantly influenced by changes in lithogenic inputs through ice melting. These results further indicate that changes  
203 in the contribution of biogenic material also do not directly explain the variation of Hg accumulation in the sediments. The  
204 main reason for not finding any statistical relation between Hg and biogenic materials is that the amount of algal material  
205 during ~~algae~~ blooms is always large and therefore not a limiting factor for the scavenging of Hg. There has always been excess  
206 algal material within or passing through the water column to scavenge all water column Hg. Thus, we assume that nearly all

207 Hg in the water column is removed through scavenging during diatom blooms, but that Hg scavenging events ~~do not or less~~  
208 ~~frequently~~ occur during summer/autumn seasons when primary productivity is lower and open ice expansion is at its maximum.  
209 Similar to other elements, the periodic-like variations observed in the preindustrial Hg record are likely attributed to the  
210 sampling variability at seasonal scales and laminae, which have different contents of biogenic and terrestrial materials. This  
211 can affect Hg concentrations. However, investigation at seasonal resolution is needed to further confirm our observations.

Commented [PM15]: Reword

212 To calculate the maximum amount of Hg which could be ~~at maximum~~ scavenged by a single bloom event we used the Hg  
213 concentration of  $271 \pm 78 \text{ pg L}^{-1}$  in Antarctic Bottom Water, as suggested by Cossa et al. (2011). A water column of one  $\text{m}^2$   
214 and 1000 m depth would then amount to  $271 \pm 78 \text{ } \mu\text{g m}^{-2}$ . This means that only about 2-3 algae blooms and scavenging events  
215 per year are necessary to obtain the average Hg accumulation rate in Adélie Basin diatom ooze sediments, i.e.  $556 \pm 137 \text{ } \mu\text{g}$   
216  $\text{m}^{-2} \text{ yr}^{-1}$ . This appears to be likely taking into account that the sinking speed of diatom agglomerates at Adélie Basin has been  
217 reported to reach 100-400 m per day (Jansen et al., 2018). Formation of Antarctic bottom water which is linked to the polynyas  
218 (Ohshima et al., 2013) can rapidly “refill” the Hg inventory in the water column after a scavenging event. This calculation  
219 suggests the high Hg accumulation rates in the Adélie Basin sediments can be solely explained by scavenging of water column  
220 Hg and does not need an additional atmospheric or terrestrial source. ~~Nevertheless, we assume that similar to CO<sub>2</sub>, Hg fluxes~~  
221 ~~from the atmosphere will increase during algae blooms as a result of continuous removal of dissolved phase Hg by diatom~~  
222 ~~particles and the resulting shift of the dissolution equilibrium towards the dissolved phase which should additionally increase~~  
223 ~~the Hg flux from the atmosphere into the water.~~ Hg removal from the upper water ~~phase column~~ by diatom organic matter will  
224 also decrease Hg re-evasion to the atmosphere as previously assumed in a model study (Soerensen et al., 2016).

Commented [PM16]: Reword

#### 225 4. Conclusions

226 Investigation of biogenic sediments revealed that biological productivity and related scavenging of water phase Hg by rapidly  
227 sinking algae or algae derived organic matter controlled preindustrial Hg accumulation in Adélie Basin, Antarctica. Our study  
228 suggests that the periodic-like variations in total Hg concentrations and accumulation rates are likely associated with the cycle  
229 of polynya opening and closing and its related changes in biological productivity. Although the high Hg accumulation in diatom  
230 ooze does not represent the Hg sedimentation process across all the world’s oceans, our data shows that Hg scavenging by  
231 algae or sinking algae derived organic matter is a key process controlling the sequestration of Hg in marine sediments; and  
232 therefore the marine biogeochemical cycle of Hg in general. This can be similar to the association between very high benthic  
233 organic C fluxes with diatom production at the surface water which can be accelerated by aggregation (Sachs et al., 2009).

234 Our observations also suggest that re-emission of Hg from ocean surface waters as a result of reduction of Hg (II) might be  
235 reduced due to Hg scavenging by algae, at least in areas of high primary productivity. Moreover, Hg fluxes to marine sediments



236 might be higher than previously assumed in global model estimations. More data from marine sediments is needed to support  
237 this assumption. A future increase in marine productivity including algae blooms especially in coastal areas and semi-closed  
238 shallow seas will likely increase the Hg flux to bottom sediments. The model study of Soerensen et al. (2016) for the Baltic  
239 Sea might serve as an example for changes in marine Hg cycling caused by eutrophication.

240 *Author contributions.* Sara Zaferani carried out the experiments. Harald Biester encouraged and supervised the findings of this  
241 work. All authors contributed to a significant part to the presented scientific work.

242 *Competing interests.* The authors declare that they have no conflict of interest

243 *Acknowledgements.* This research was supported by TU Braunschweig. We thank P. Schmidt and A. Calcan for technical  
244 assistance, Dr. DS. McLagan for the constructive comments.

## 245 **References**

246 Amos, H. M., Jacob, D. J., Streets, D. G. and Sunderland, E. M.: Legacy impacts of all-time anthropogenic emissions on the  
247 global mercury cycle, *Global Biogeochem. Cycles*, 27, 410–421, <https://doi.org/10.1002/gbc.20040>, 2013.

248 Arrigo, K. R., Worthen, D., Schnell, A. and Lizotte, M. P.: Primary production in Southern Ocean waters, *J. Geophys. Res.*  
249 *Ocean.*, 103, 15587–15600, <https://doi.org/10.1029/98JC00930>, 1998.

250 Biester, H., Pérez-Rodríguez, M., Gilfedder, B. S., Martínez Cortizas, A. and Hermanns, Y. M.: Solar irradiance and primary  
251 productivity controlled mercury accumulation in sediments of a remote lake in the Southern Hemisphere during the past 4000  
252 years, *Limnol. Oceanogr.*, 63, 540–549, <https://doi.org/10.1002/lno.10647>, 2018.

253 Cheburkin, A. K. and Shotykh, W.: An energy-dispersive miniprobe multielement analyzer (EMMA) for direct analysis of Pb  
254 and other trace elements in peats, *Fresenius. J. Anal. Chem.*, 354, 688–691, <https://doi.org/10.1007/s0021663540688>, 1996.

255 Chen, S.-Y., Ambe, S., Takematsu, N. and Ambe, F.: The chemical states of iron in marine sediments by means of Mössbauer  
256 spectroscopy in combination with chemical leachings, *J. Oceanogr.*, 52, 705–715, <https://doi.org/10.1007/BF02239461>, 1996.

257 Cossa, D., Heimbu, L., Lannuzel, D., Rintoul, S. R., Butler, E. C. V., Bowie, A. R., Averty, B., Watson, R. J. and Remenyi, T.:  
258 Mercury in the Southern Ocean, *Geochim. Cosmochim. Acta*, 75, 4037–4052, <https://doi.org/10.1016/j.gca.2011.05.001>, 2011.

259 Crosta, X., Romero, O., Armand, L. K. and Pichon, J.-J.: The biogeography of major diatom taxa in Southern Ocean sediments:  
260 2. Open ocean related species, *Palaeogeogr. Palaeoclimatol. Palaeoecol.*, 223, 66–92,  
261 <https://doi.org/10.1016/j.palaeo.2005.02.015>, 2005.

262 Croudace, I. W. and Rothwell, R. G.: *Micro-XRF Studies of Sediment Cores: Applications of a non-destructive tool for the*  
263 *environmental sciences*, Springer., 2015.

- 264 Denis, D., Crosta, X., Zaragosi, S., Romero, O., Martin, B. and Mas, V.: Seasonal and subseasonal climate changes recorded  
265 in laminated diatom ooze sediments, Adelie Land, East Antarctica, *The Holocene*, 16, 1137–1147,  
266 <https://doi.org/10.1177%2F0959683606069414>, 2006.
- 267 Driscoll, C. T., Mason, R. P., Chan, H. M., Jacob, D. J. and Pirrone, N.: Mercury as a global pollutant: Sources, pathways, and  
268 effects, *Environ. Sci. Technol.*, 47, 4967–4983, <https://doi.org/10.1021/es305071v>, 2013.
- 269 Escutia, C., Brinkhuis, H., Klaus, A. and Scientists, E. 318: Site U1357, *Proc. Integr. Ocean Drill. Programprogr.*, 318,  
270 doi:10.2204/iodp.proc.318.105.2011, 2011.
- 271 Le Faucheur, S., Campbell, P. G., Fortin, C. and Slaveykova, V. I.: Interactions between mercury and phytoplankton:  
272 speciation, bioavailability, and internal handling, *Environ. Toxicol. Chem.*, 33, 1211–1224, <https://doi.org/10.1002/etc.2424>,  
273 2014.
- 274 Fitzgerald, W. F., Lamborg, C. H. and Hammerschmidt, C. R.: Marine biogeochemical cycling of mercury, *Chem. Rev.*, 107,  
275 641–662, <https://doi.org/10.1021/cr050353m>, 2007.
- 276 Fütterer, D. K.: The solid phase of marine sediments, in: *Marine geochemistry*, edited by H. D. Schulz and M. Zabel, pp. 1–  
277 25, Springer, Berlin, Heidelberg, [https://doi.org/10.1007/978-3-662-04242-7\\_1%0A](https://doi.org/10.1007/978-3-662-04242-7_1%0A), 2006.
- 278 Horowitz, H. M., Jacob, D. J., Zhang, Y., Dibble, T. S., Slemr, F., Amos, H. M., Schmidt, J. A., Corbitt, E. S., Marais, E. A.  
279 and Sunderland, E. M.: A new mechanism for atmospheric mercury redox chemistry: implications for the global mercury  
280 budget, *Atmos. Chem. Phys.*, 17, 6353–6371, <https://doi.org/10.5194/acp-17-6353-2017>, 2017.
- 281 Jansen, J., Hill, N. A., Dunstan, P. K., McKinlay, J., Sumner, M. D., Post, A. L., Eléaume, M. P., Armand, L. K., Warnock, J.  
282 P., Galton-Fenzi, B. K. and Johnson, C. R.: Abundance and richness of key Antarctic seafloor fauna correlates with modelled  
283 food availability, *Nat. Ecol. Evol.*, 2, 71–80, <https://doi.org/10.1038/s41559-017-0392-3>, 2018.
- 284 Lamborg, C., Bowman, K., Hammerschmidt, C., Gilmour, C., Munson, K., Selin, N. and Tseng, C.-M.: Mercury in the  
285 Anthropocene Ocean, *Oceanography*, 27, 76–87, <https://doi.org/10.5670/oceanog.2014.11>, 2014a.
- 286 Lamborg, C. H., Fitzgerald, W. F., O'Donnell, J. and Torgersen, T.: A non-steady-state compartmental model of global-scale  
287 mercury biogeochemistry with interhemispheric atmospheric gradients, *Geochim. Cosmochim. Acta*, 66, 1105–1118,  
288 [https://doi.org/10.1016/S0016-7037\(01\)00841-9](https://doi.org/10.1016/S0016-7037(01)00841-9), 2002.
- 289 Lamborg, C. H., Hammerschmidt, C. R., Bowman, K. L., Swarr, G. J., Munson, K. M., Ohnemus, D. C., Lam, P. J.,  
290 Heimbürger, L., Rijkensberg, M. J. A. and Saito, M. A.: A global ocean inventory of anthropogenic mercury based on water  
291 column measurements, *Nature*, 512, 65–68, <https://doi.org/10.1038/nature13563>, 2014b.
- 292 Lamborg, C. H., Hammerschmidt, C. R. and Bowman, K. L.: An examination of the role of particles in oceanic mercury  
293 cycling, *Philos. Trans. R. Soc. A Math. Phys. Eng. Sci.*, 374, 20150297, <https://doi.org/10.1098/rsta.2015.0297>, 2016.
- 294 Leri, A. C., Mayer, L. M., Thornton, K. R., Northrup, P. A., Dunigan, M. R., Ness, K. J. and Gellis, A. B.: A marine sink for  
295 chlorine in natural organic matter, *Nat. Geosci.*, 8, 620–624, <https://doi.org/10.1038/ngeo2481>, 2015.

- 296 Lohan, M. C. and Tagliabue, A.: Oceanic micronutrients: trace metals that are essential for marine life, *Elements*, 14, 385–  
297 390, <https://doi.org/10.2138/gselements.14.6.385>, 2018.
- 298 Mason, R. and Sheu, G.-R.: Role of the ocean in the global mercury cycle, *Global Biogeochem. Cycles*, 16, 1–14,  
299 <https://doi.org/10.1029/2001GB001440>, 2002.
- 300 Mason, R. P., Fitzgerald, W. F. and Morel, F. M.: The biogeochemical cycling of elemental mercury: anthropogenic influences,  
301 *Geochim. Cosmochim. Acta*, 58, 3191–3198, [https://doi.org/10.1016/0016-7037\(94\)90046-9](https://doi.org/10.1016/0016-7037(94)90046-9), 1994.
- 302 Mason, R. P., Reinfelder, J. R. and Morel, F. M.: Uptake , Toxicity , and Trophic Transfer of Mercury in a Coastal Diatom,  
303 *Environ. Sci. Technol.*, 30, 1835–1845, <https://doi.org/10.1021/es950373d>, 1996.
- 304 Mason, R. P., Choi, A. L., Fitzgerald, W. F., Hammerschmidt, Chad R Lamborg, C. H., Soerensen, A. L. and Sunderland, E.  
305 M.: Mercury biogeochemical cycling in the ocean and policy implications, *Environ. Res.*, 119, 101–117,  
306 <https://doi.org/10.1016/j.envres.2012.03.013>, 2012.
- 307 Moran, S. and Moore, R.: Kinetics of the removal of dissolved aluminum by diatoms in seawater: A comparison with thorium,  
308 *Geochim. Cosmochim. Acta*, 56, 3365–3374, [https://doi.org/10.1016/0016-7037\(92\)90384-U](https://doi.org/10.1016/0016-7037(92)90384-U), 1992.
- 309 Morel, F. M. and Price, N.: The biogeochemical cycles of trace metals in the oceans, *Science*, 300, 944–947,  
310 <https://doi.org/10.1126/science.1083545>, 2003.
- 311 Morel, F. M. M., Reinfelder, J. R., Roberts, S. B., Chamberlain, C. P., Lee, J. G. and Yee, D.: Zinc and carbon co-limitation  
312 of marine phytoplankton, *Nature*, 369, 740–742, <https://doi.org/10.1038/369740a0>, 1994.
- 313 Ohshima, K. I., Fukamachi, Y., Williams, G. D., Nihashi, S., Roquet, F., Kitade, Y., Tamura, T., Hirano, D.,  
314 HerraizBorreguero, L., Field, L., Hindell, M., Aoki, S. and Wakatsuchi, M.: Antarctic Bottom Water production by intense sea-  
315 ice formation in the Cape Darnley polynya, *Nat. Geosci.*, 6, 235–240, <https://doi.org/10.1038/ngeo1738>, 2013.
- 316 Sachs, O., Sauter, E. J., Schlüter, M., Rutgers van der Loeff, M. M., Jerosch, K. and Holby, O.: Benthic organic carbon flux  
317 and oxygen penetration reflect different plankton provinces in the Southern Ocean, *Deep. Res. Part I Oceanogr. Res. Pap.*, 56,  
318 1319–1335, <https://doi.org/10.1016/j.dsr.2009.02.003>, 2009.
- 319 Schartup, A. T., Thackray, C. P., Qureshi, A., Dassuncao, C., Gillespie, K., Hanke, A. and Sunderland, E. M.: Climate  
320 change and overfishing increase neurotoxicant in marine predators, *Nature*, 572, 648–650, <https://doi.org/10.1038/s41586-019-14689>, 2019.
- 322 Schlesinger, W. H. and Bernhardt, E. S.: The Oceans, in: *Biogeochemistry: an analysis of global change*, pp. 341–395,  
323 Academic press., 2013.
- 324 Selin, N. E.: Global biogeochemical cycling of mercury: a review, *Annu. Rev. Environ. Resour.*, 34, 43–63,  
325 <https://doi.org/10.1146/annurev.enviro.051308.084314>, 2009.
- 326 Shanks, A. L. and Trent, J. D.: Marine snow: microscale nutrient patches 1, *Limnol. Oceanogr.*, 24, 850–854,  
327 <https://doi.org/10.4319/lo.1979.24.5.0850>, 1979.

- 328 Soerensen, A. L., Schartup, A. T., Gustafsson, E., Gustafsson, B. G., Undeman, E. and Björn, E.: Eutrophication increases  
329 phytoplankton methylmercury concentrations in a coastal sea - A Baltic sea case study, *Environ. Sci. Technol.*, 50, 11787–  
330 11796, <https://doi.org/10.1021/acs.est.6b02717>, 2016.
- 331 Sunderland, E. M. and Mason, R. P.: Human impacts on open ocean mercury concentrations, *Global Biogeochem. Cycles*, 21,  
332 1–15, <https://doi.org/10.1029/2006GB002876>, 2007.
- 333 Vandal, G. M., Fitzgerald, W. F., Boutron, C. F. and Candelone, J.-P.: Variations in mercury deposition to Antarctica over the  
334 past 34,000 years, *Nature*, 362, 621, <https://doi.org/10.1038/362621a0>, 1993.
- 335 Zaferani, S., Pérez-rodríguez, M. and Biester, H.: Diatom ooze—A large marine mercury sink, *Science*, 361, 797–800,  
336 <https://doi.org/10.1126/science.aat2735>, 2018.
- 337

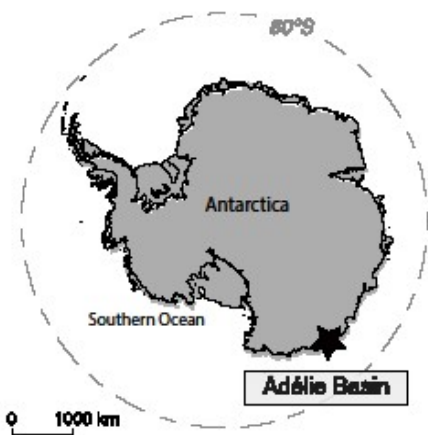

337

338 Figure 1: Map of Antarctica with the coring location of the IODP318-U1357B in Adélie Basin (Source: figure modified from  
339 Zaferani et al. (2018)).

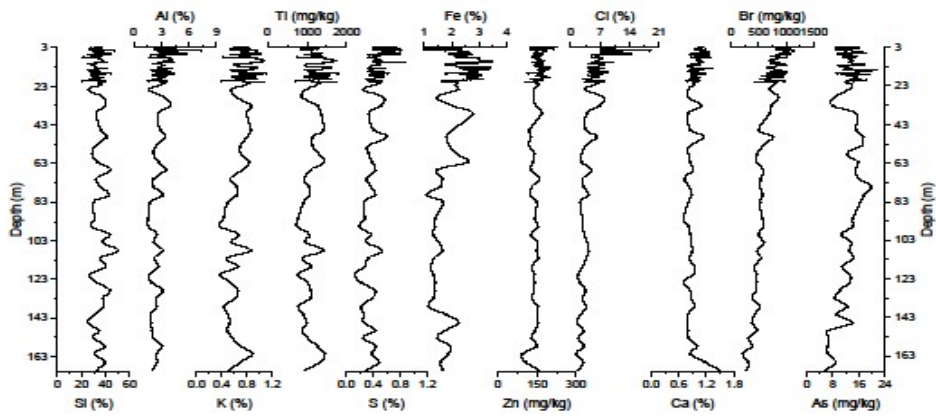

340

341 Figure 2: Down core records of Si, Al, K, Ti, S, Fe, Zn, Cl, Ca, Br, and As concentrations of Adélie Basin sediments.

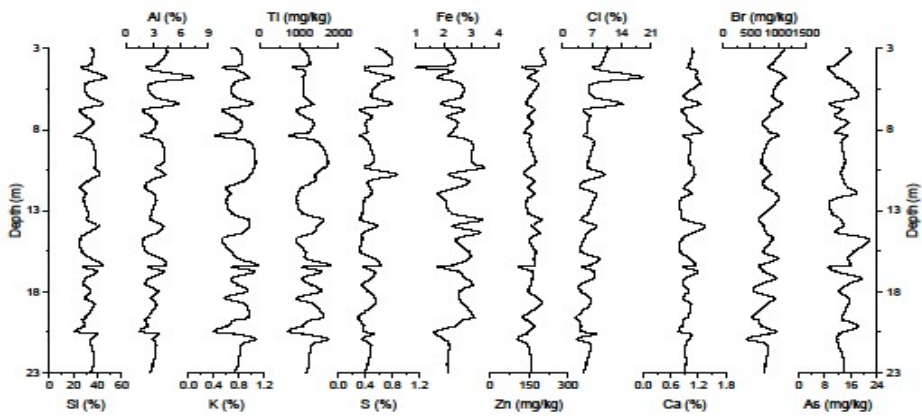

342

343 **Figure 3:** Down core records of Si, Al, K, Ti, S, Fe, Zn, Cl, Ca, Br, and As concentrations of Adélie Basin sediments for the top 23 m  
 344 of the core.

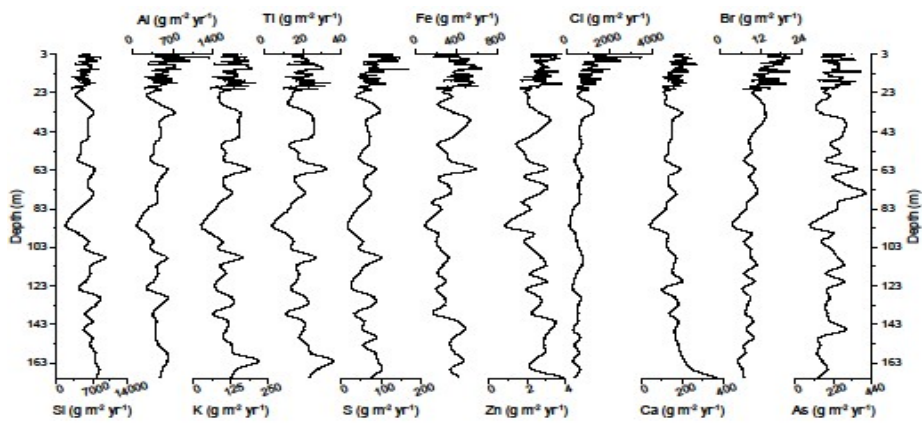

345

346 **Figure 4: Down core records of Si, Al, K, Ti, S, Fe, Zn, Cl, Ca, Br, and As accumulation rates of Adélie Basin sediments.**



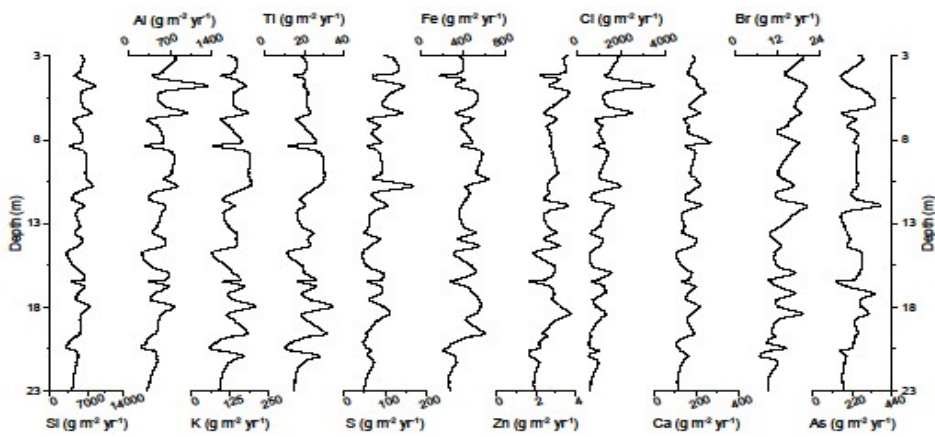

347

348 Figure 5: Down core records of Si, Al, K, Ti, S, Fe, Zn, Cl, Ca, Br, and As accumulation rates of Adélie Basin sediments for the top  
 349 23 m of the core.

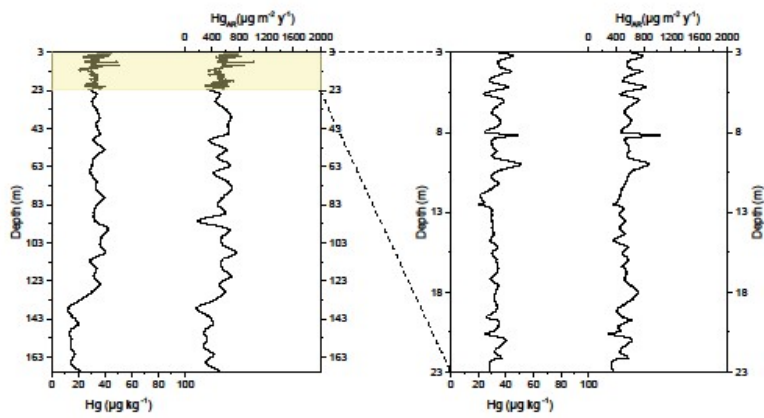

350

351 **Figure 6: Down core records of Hg concentrations and accumulation rates of Adélie Basin sediments.**

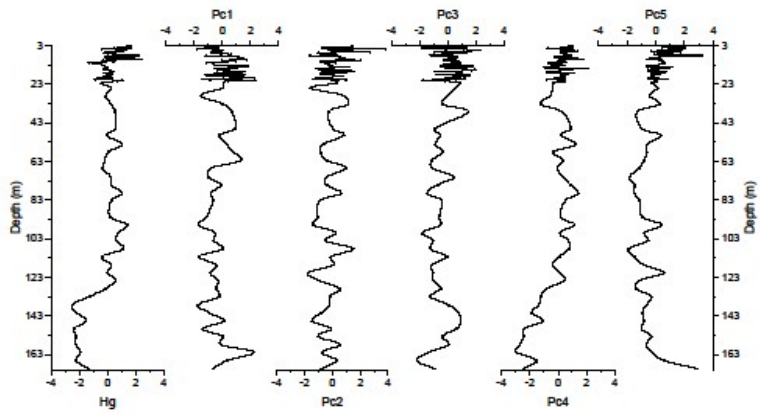

352

353 **Figure 7: Depth records of scores of the principal components extracted by PCA on the elemental composition of the sediments along**  
 354 **with Z-score of Hg of the Adélie Basin sediments.**

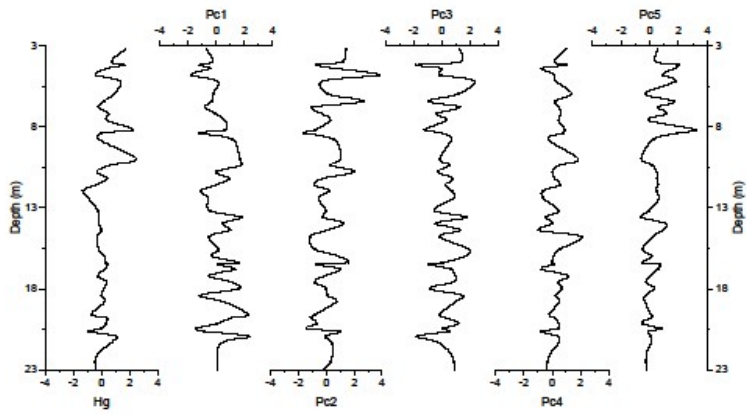

355

356 **Figure 8: Depth records of scores of the principal components extracted by PCA on the elemental composition of the sediments along**  
 357 **with Z-score of Hg of the Adélie Basin sediments for the top 23 m of the core.**

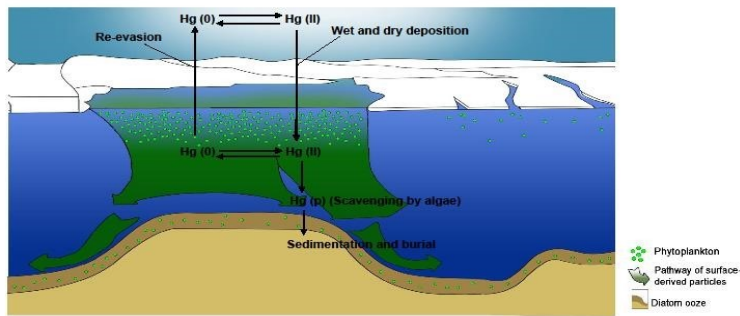

358

359 **Figure 9: Adélie Basin schematic Hg cycle model indicating the processes controlling Hg deposition and accumulation under high**  
 360 **primary production. Fast-sinking diatom particles remove dissolved water phase Hg from the water column through scavenging.**  
 361 **Hg removal from the dissolved phase by diatom particles will also decrease the Hg re- evasion to the atmosphere (Figure is adapted**  
 362 **from (Jansen et al., 2018)).**

363 **Table 1: Factor loadings for the five significant components extracted by PCA from Adélie Basin sediment samples.**

| Elements          | Components  |             |             |              |             |
|-------------------|-------------|-------------|-------------|--------------|-------------|
|                   | 1           | 2           | 3           | 4            | 5           |
| <b>Mn</b>         | <b>0.89</b> | 0.40        | -0.05       | -0.05        | 0.01        |
| <b>Ti</b>         | <b>0.89</b> | 0.43        | 0.01        | 0.04         | -0.02       |
| <b>Rb</b>         | <b>0.84</b> | 0.03        | 0.39        | 0.10         | 0.20        |
| <b>Zr</b>         | <b>0.83</b> | -0.22       | 0.05        | -0.15        | 0.08        |
| <b>K</b>          | <b>0.73</b> | <b>0.66</b> | 0.05        | 0.08         | 0.10        |
| <b>Y</b>          | <b>0.73</b> | -0.34       | 0.10        | -0.09        | 0.05        |
| <b>Al</b>         | 0.12        | <b>0.93</b> | 0.06        | 0.05         | 0.18        |
| <b>Si</b>         | 0.03        | <b>0.84</b> | -0.28       | -0.11        | -0.28       |
| <b>S</b>          | 0.01        | <b>0.84</b> | 0.16        | 0.12         | 0.26        |
| <b>Cl</b>         | -0.16       | <b>0.76</b> | 0.25        | 0.22         | 0.42        |
| <b>Zn</b>         | -0.05       | 0.15        | <b>0.78</b> | 0.15         | 0.11        |
| <b>Cu</b>         | 0.31        | 0.03        | <b>0.76</b> | 0.31         | 0.21        |
| <b>Ni</b>         | 0.11        | -0.08       | <b>0.75</b> | -0.10        | 0.00        |
| <b>Fe</b>         | <b>0.62</b> | 0.03        | <b>0.64</b> | 0.20         | 0.19        |
| <b>Br</b>         | -0.23       | 0.35        | <b>0.50</b> | 0.46         | 0.48        |
| <b>Hg</b>         | 0.17        | 0.09        | -0.04       | <b>0.79</b>  | 0.14        |
| <b>As</b>         | -0.01       | -0.09       | 0.30        | <b>0.73</b>  | -0.26       |
| <b>Pb</b>         | 0.35        | -0.11       | -0.10       | <b>-0.62</b> | -0.18       |
| <b>Sr</b>         | 0.25        | 0.09        | 0.37        | 0.16         | <b>0.83</b> |
| <b>Ca</b>         | 0.22        | <b>0.52</b> | -0.03       | -0.13        | <b>0.67</b> |
| <b>Eigenvalue</b> | 6.62        | 3.95        | 3.34        | 1.35         | 0.98        |
| <b>% variance</b> | 33.1        | 19.7        | 16.7        | 6.7          | 4.9         |

364
